# Supplementary material
Source: publisher figshare collection journal article supplement (https://frontiersin.figshare.com/ndownloader/files/16349780)
Supplement: Supplementary file [file 16349780]

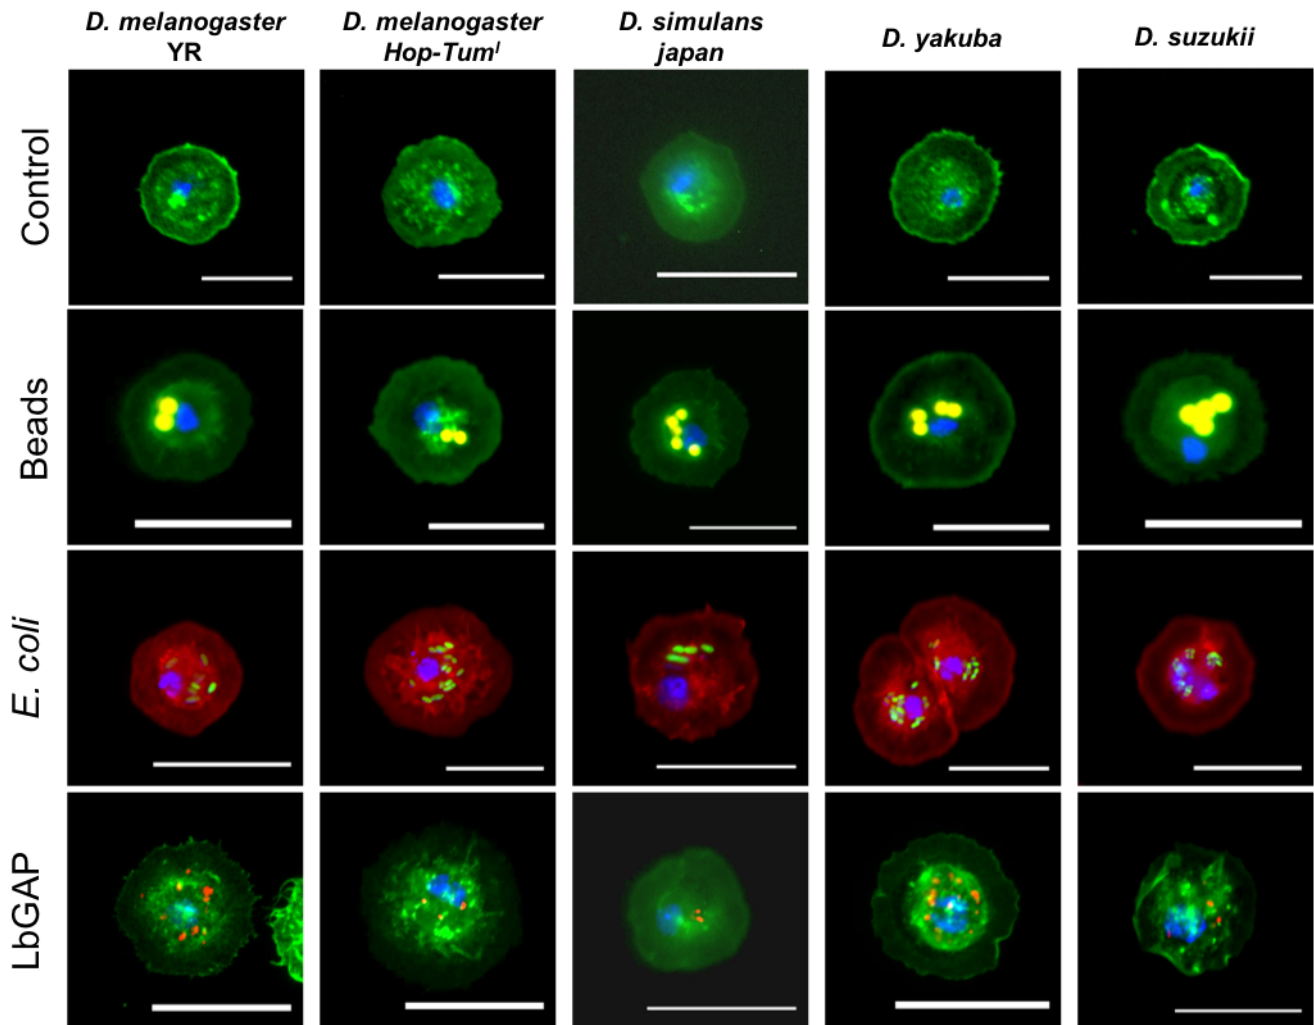

**S6 Figure: Phagocytic properties of plasmotocytes from different *Drosophila* species.** First row: plasmotocytes observed in hemolymph of 18h parasitized *D. melanogaster* YR and *hop<sup>Tum-I</sup>*, *D. simulans* Japan, *D. yakuba* and *D. suzukii*. Plasmotocytes were observed 4 hours after injection of 18h parasitized L2 larvae with fluorescent latex beads (Second row), green fluorescent *E. coli* (third row) and venosomes (fourth row) to evaluate their phagocytic properties. Actin labelled with green (rows 1, 2 and 4) or red (row 3) fluorescent phalloidin; in blue, nucleus stained with DAPI. Row 4, phagocytosed LbGAP immunolocalized in red. Bar 20µm.
